# Supplementary material for: Use of a Food Frequency Questionnaire for the Estimation of Gut Microbiota Composition Based on Dietary Patterns and Its Association with Irritable Bowel Syndrome Symptoms in the Lebanese Adult Population: A Cross-Sectional Study
Source: Hindawi journal article supplement (doi:10.1155/2024/6962855), 2024-02-14
Supplement: f2 [file 6962855.f2.pdf]

| <b>Table S1. KMO and Bartlett's Test</b>        |                    |                   |
|-------------------------------------------------|--------------------|-------------------|
| Kaiser-Meyer-Olkin Measure of Sampling Adequacy |                    | <b>.826</b>       |
| Bartlett's Test of Sphericity                   | Approx. Chi-Square | 2433.710          |
|                                                 | df                 | 231               |
|                                                 | <i>P</i> value     | <b>&lt;0.0001</b> |
