# Supplementary material for: Use of a Food Frequency Questionnaire for the Estimation of Gut Microbiota Composition Based on Dietary Patterns and Its Association with Irritable Bowel Syndrome Symptoms in the Lebanese Adult Population: A Cross-Sectional Study
Source: Hindawi journal article supplement (doi:10.1155/2024/6962855), 2024-02-14
Supplement: f3 [file 6962855.f3.pdf]

| <b>Table S2. Forced Total Variance Explained</b> |                     |               |               |                                     |               |               |                                   |               |               |
|--------------------------------------------------|---------------------|---------------|---------------|-------------------------------------|---------------|---------------|-----------------------------------|---------------|---------------|
| Component                                        | Initial Eigenvalues |               |               | Extraction Sums of Squared Loadings |               |               | Rotation Sums of Squared Loadings |               |               |
|                                                  | Total               | % of Variance | Cumulative %  | Total                               | % of Variance | Cumulative %  | Total                             | % of Variance | Cumulative %  |
| <b>1</b>                                         | <b>5.155</b>        | <b>23.430</b> | <b>23.430</b> | <b>5.155</b>                        | <b>23.430</b> | <b>23.430</b> | <b>4.425</b>                      | <b>20.113</b> | <b>20.113</b> |
| <b>2</b>                                         | <b>2.325</b>        | <b>10.570</b> | <b>34.000</b> | <b>2.325</b>                        | <b>10.570</b> | <b>34.000</b> | <b>2.968</b>                      | <b>13.490</b> | <b>33.603</b> |
| <b>3</b>                                         | <b>2.217</b>        | <b>10.078</b> | <b>44.078</b> | <b>2.217</b>                        | <b>10.078</b> | <b>44.078</b> | <b>2.305</b>                      | <b>10.475</b> | <b>44.078</b> |
| 4                                                | 1.133               | 5.149         | 49.227        |                                     |               |               |                                   |               |               |
| 5                                                | 1.038               | 4.718         | 53.946        |                                     |               |               |                                   |               |               |
| 6                                                | .988                | 4.493         | 58.439        |                                     |               |               |                                   |               |               |
| 7                                                | .907                | 4.124         | 62.563        |                                     |               |               |                                   |               |               |
| 8                                                | .823                | 3.741         | 66.304        |                                     |               |               |                                   |               |               |
| 9                                                | .802                | 3.646         | 69.950        |                                     |               |               |                                   |               |               |
| 10                                               | .750                | 3.407         | 73.357        |                                     |               |               |                                   |               |               |
| 11                                               | .680                | 3.089         | 76.446        |                                     |               |               |                                   |               |               |
| 12                                               | .661                | 3.006         | 79.452        |                                     |               |               |                                   |               |               |
| 13                                               | .647                | 2.939         | 82.392        |                                     |               |               |                                   |               |               |
| 14                                               | .581                | 2.640         | 85.032        |                                     |               |               |                                   |               |               |
| 15                                               | .551                | 2.506         | 87.538        |                                     |               |               |                                   |               |               |
| 16                                               | .493                | 2.243         | 89.781        |                                     |               |               |                                   |               |               |
| 17                                               | .451                | 2.051         | 91.832        |                                     |               |               |                                   |               |               |
| 18                                               | .421                | 1.912         | 93.744        |                                     |               |               |                                   |               |               |
| 19                                               | .391                | 1.776         | 95.520        |                                     |               |               |                                   |               |               |
| 20                                               | .381                | 1.733         | 97.253        |                                     |               |               |                                   |               |               |
| 21                                               | .338                | 1.535         | 98.788        |                                     |               |               |                                   |               |               |
| 22                                               | .267                | 1.212         | 100.000       |                                     |               |               |                                   |               |               |

*Extraction Method: Principal Component Analysis.*
