# Supplementary material for: Use of a Food Frequency Questionnaire for the Estimation of Gut Microbiota Composition Based on Dietary Patterns and Its Association with Irritable Bowel Syndrome Symptoms in the Lebanese Adult Population: A Cross-Sectional Study
Source: Hindawi journal article supplement (doi:10.1155/2024/6962855), 2024-02-14
Supplement: f4 [file 6962855.f4.pdf]

**Table S3. Simple bivariate logistic regression analysis for EGMC outcome and its covariates**

| <b>Characteristics</b> | <b>Odds ratio (95% CI)</b> | <b>P value</b> |
|------------------------|----------------------------|----------------|
| <b>Gender</b>          |                            |                |
| Male                   | 1.00                       | 0.056          |
| Female                 | 0.658 (0.428-1.012)        |                |
| <b>BMI</b>             |                            |                |
| Low                    | 1.00                       | 0.102          |
| High                   | 0.698 (0.453-1.074)        |                |
| <b>Age range</b>       |                            |                |
| 20-45 years old        | 1.00                       | <b>0.047</b>   |
| 46-70 years old        | 0.547 (0.301-0.992)        |                |
| <b>Smoking</b>         |                            |                |
| Yes                    | 0.963 (0.638-1.454)        | 0.857          |
| No                     | 1.00                       |                |
| <b>IBS</b>             |                            |                |
| Yes                    | 0.636 (0.419-0.967)        | <b>0.034</b>   |
| No                     | 1.00                       |                |
| <b>CVD</b>             |                            |                |
| Yes                    | 0.543 (0.225-1.310)        | 0.174          |
| No                     | 1.00                       |                |

*EGMC, estimated gut microbiota composition. Numbers in bold indicate significant P values (<0.05)*
