# Supplementary material for: Use of a Food Frequency Questionnaire for the Estimation of Gut Microbiota Composition Based on Dietary Patterns and Its Association with Irritable Bowel Syndrome Symptoms in the Lebanese Adult Population: A Cross-Sectional Study
Source: Hindawi journal article supplement (doi:10.1155/2024/6962855), 2024-02-14
Supplement: f5 [file 6962855.f5.pdf]

**Table S4. Multiple logistic regression analysis for EGMC and the independent variable presence of IBS symptoms**

| <b>Characteristics</b> | <b>COR (95% CI)</b> | <b><i>P</i> value</b> | <b>AOR1 (95% CI)</b> | <b><i>P</i> value</b> | <b>AOR2 (95% CI)</b> | <b><i>P</i> value</b> | <b>AOR3 (95% CI)</b> | <b><i>P</i> value</b> |
|------------------------|---------------------|-----------------------|----------------------|-----------------------|----------------------|-----------------------|----------------------|-----------------------|
| <b>IBS</b>             |                     |                       |                      |                       |                      |                       |                      |                       |
| Yes                    | 1                   | <b>0.034</b>          | 1                    | <b>0.024</b>          | 1                    | 0.065                 | 1                    | 0.135                 |
| No                     | 0.636 (0.419-0.967) |                       | 0.614 (0.402-0.937)  |                       | 0.665 (0.430-1.026)  |                       | 0.713 (0.458-1.111)  |                       |

*COR, crude odd ratio; CI, confidence interval; AOR1, adjusted odd ratio (model 1); AOR2, further adjusted odd ratio (model 2); AOR3, adjusted odd ratio (model 3) Numbers in bold indicate significant P values (<0.05); Model 1 is adjusted for age range (universal covariate), Model 2 is further adjustment for gender (universal covariate), Model 3 is further adjustment for other variables that are eligible (p<0.2) (BMI and cardiovascular diseases)*
