# Supplementary figures and images for: Use of a Food Frequency Questionnaire for the Estimation of Gut Microbiota Composition Based on Dietary Patterns and Its Association with Irritable Bowel Syndrome Symptoms in the Lebanese Adult Population: A Cross-Sectional Study
Source: Hindawi journal article supplement (doi:10.1155/2024/6962855), 2024-02-14

## Scree Plot

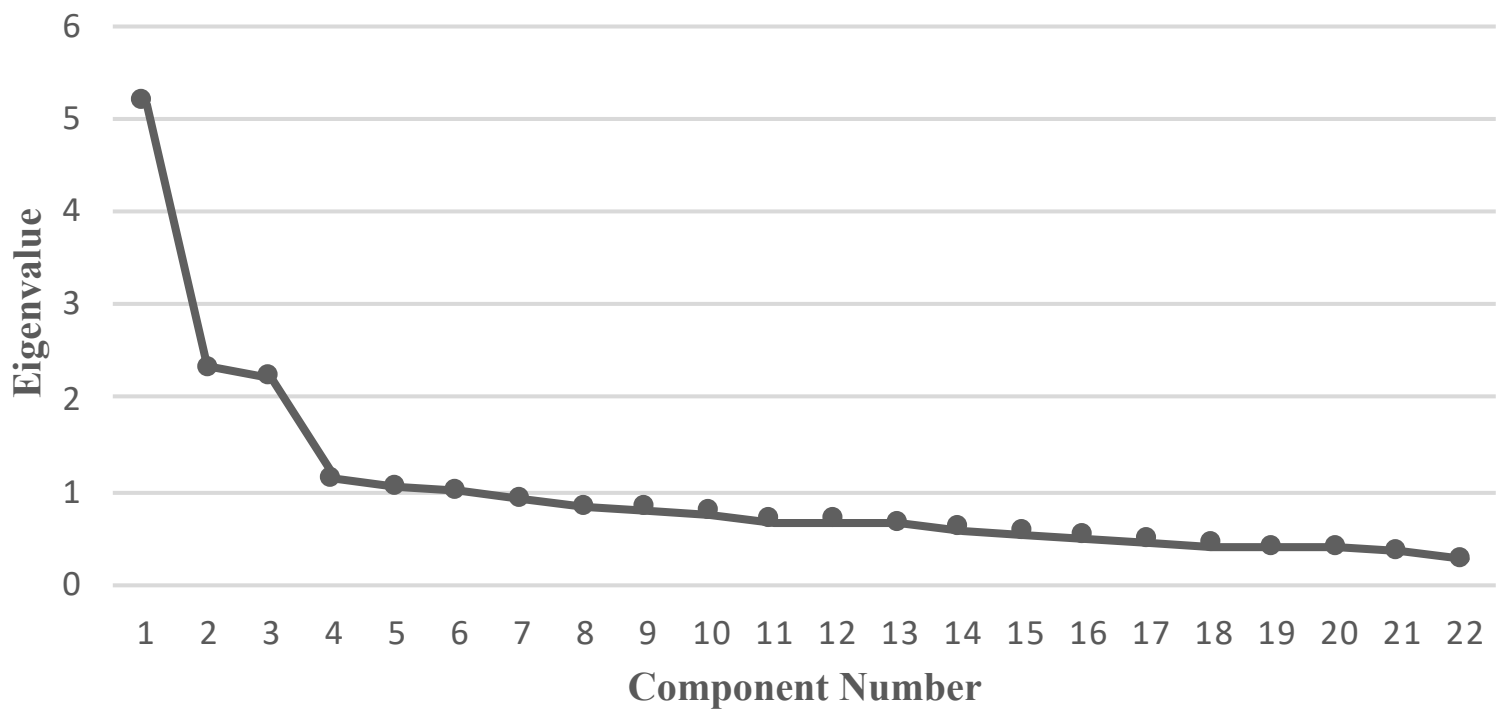

Supplement: f1 [file 6962855.f1.pdf]
